# Supplementary material for: Soyuretox, an Intrinsically Disordered Polypeptide Derived from Soybean (Glycine Max) Ubiquitous Urease with Potential Use as a Biopesticide
Source: MDPI journal article supplement (doi:10.3390/ijms20215401), 2019-10-30
Supplement: s1 [file s1]

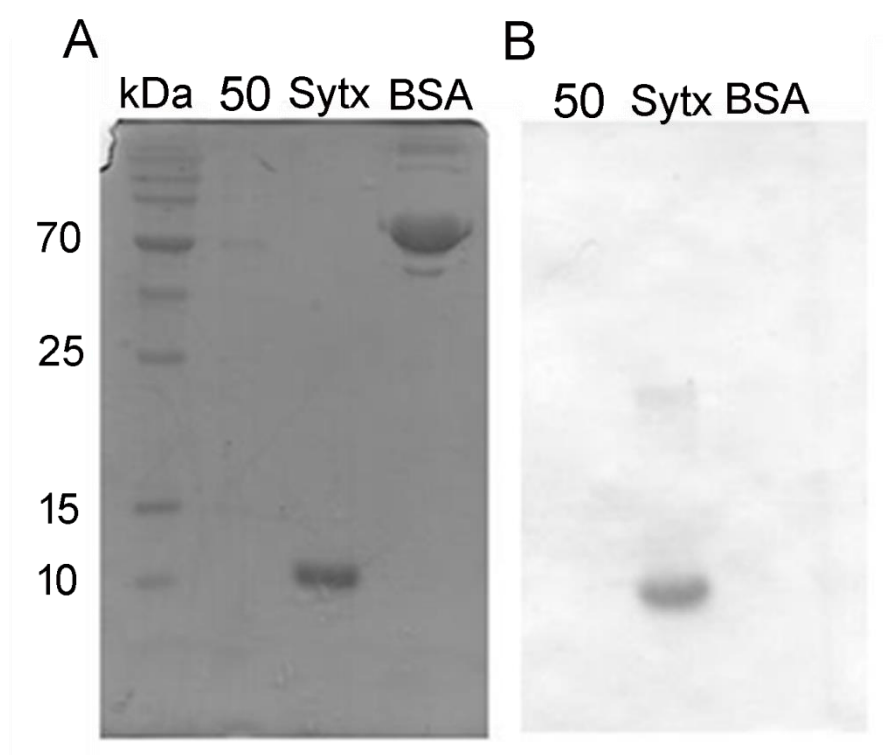

**Figure S1** Soyuretox purity and identification were accessed by SDS/PAGE (NuPAGE Novex 12% Bis-Tris gels (A) and western blot using anti-Jaburetox antibody (1:7,500) and Goat antirabbit IgG alkaline phosphatase conjugated (1:20,000) (B). Standard protein marker (Thermo scientific); kDa; 50: fraction eluted from the nickel affinity column in buffer complemented with 50 mM imidazol; Sytx: Soyuretox reach fraction obtained from the last step of purification; BSA: bovine serum albumin.

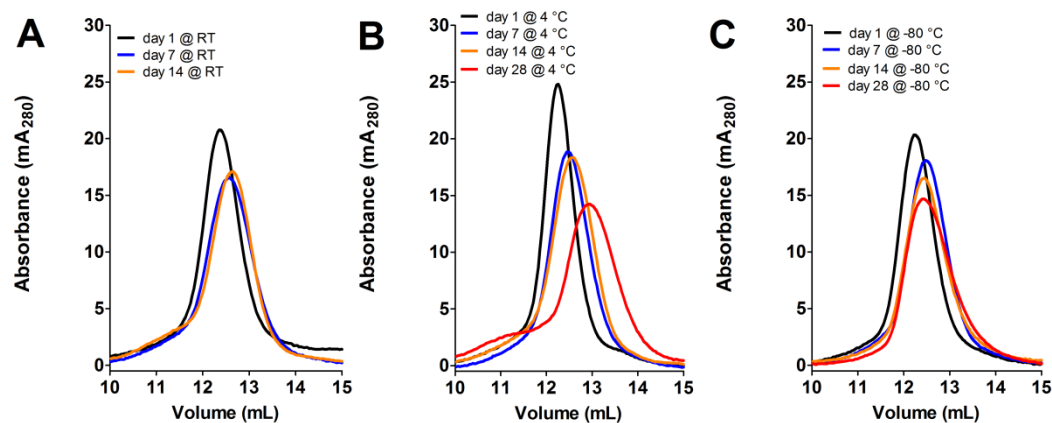

**Figure S2.** Analysis of Soyuretox stability. (A) Soyuretox storage at room temperature (RT, ~25 °C) for 1, 7 and 14 days; (B) Soyuretox storage at 4 °C for 1, 7, 14 and 28 days; (C) Soyuretox storage at -80 °C for 1, 7, 14 and 28 days. Soyuretox aliquots were 2.8 mg/mL (253  $\mu$ M) in 50 mM sodium phosphate buffer, 1 mM EDTA, 1 mM TCEP, pH 8.0, at each time point Soyuretox samples of each condition were subjected to gel-filtration in a Superdex 75 (10/300) column. Elution patterns were followed by absorbance at 280 nm.

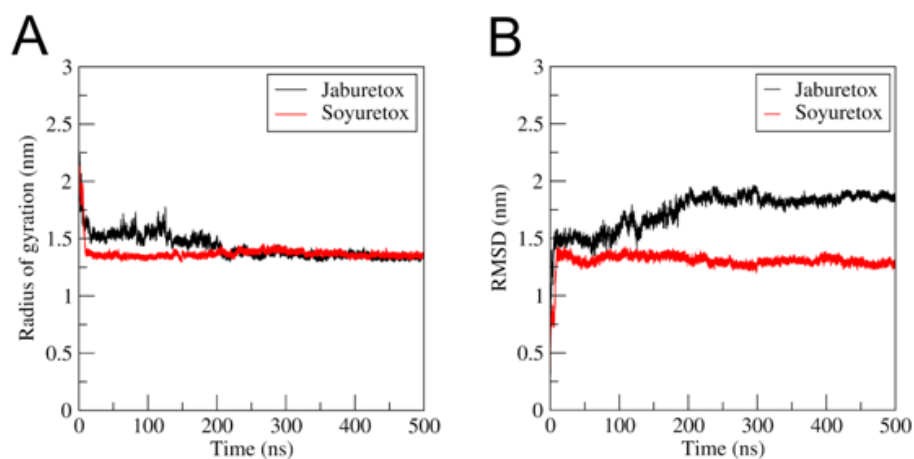

**Figure S3.** Time course of soyuretox conformational changes in aqueous solution. (A) Radius of gyration and (B) all-atom root mean square deviation (RMSD) of soyuretox molecular dynamic simulation during 500 ns (red), in comparison to jaburetox (black) (data from Martinelli et al., 2014 (Martinelli et al., 2014)).

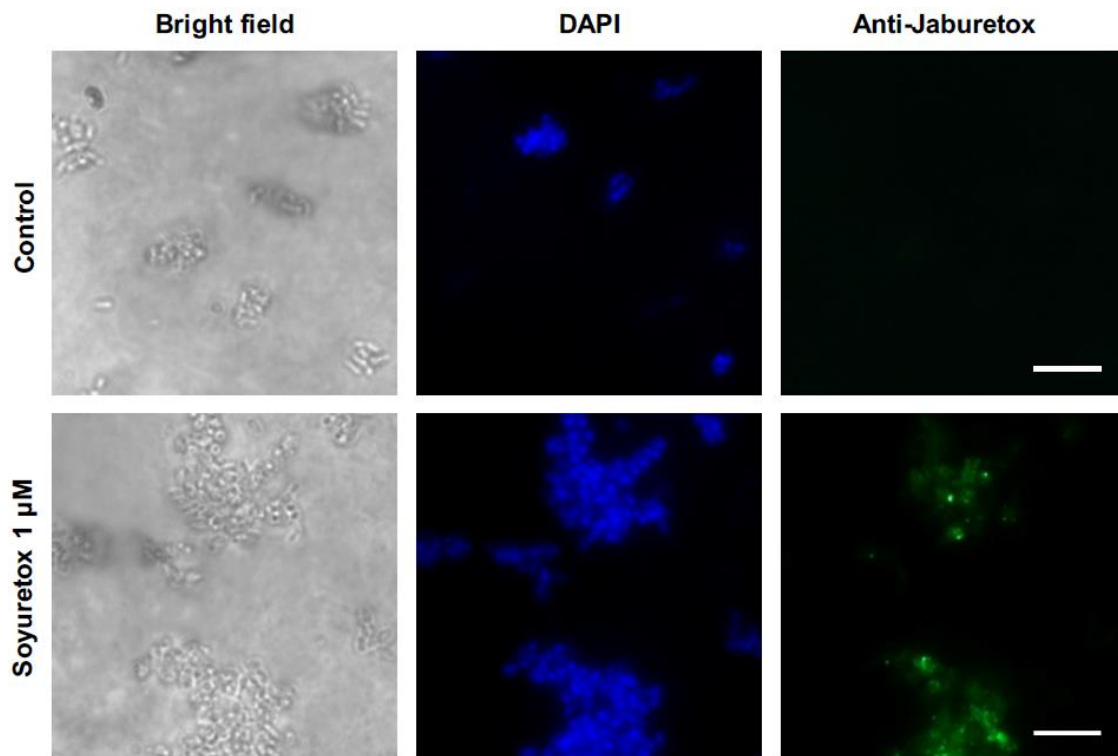

**Figure S4.** Soyuretox-*C. albicans* cells interaction. Yeast cells were incubated with 1  $\mu$ M soyuretox for 24 h at 28  $^{\circ}$ C. Afterwards, the cells were fixed with formaldehyde 4%, permeabilized and blocked with 5% BSA-0.1% Triton X100 and incubated with rabbit polyclonal anti-jaburetox antibodies (1:750) followed by anti-rabbit IgG antibodies conjugated to Alexa 488 (green). Nuclei were stained with DAPI. Control experiment was in presence of 10 mM Tris pH 7.0. Bars: 10  $\mu$ m.

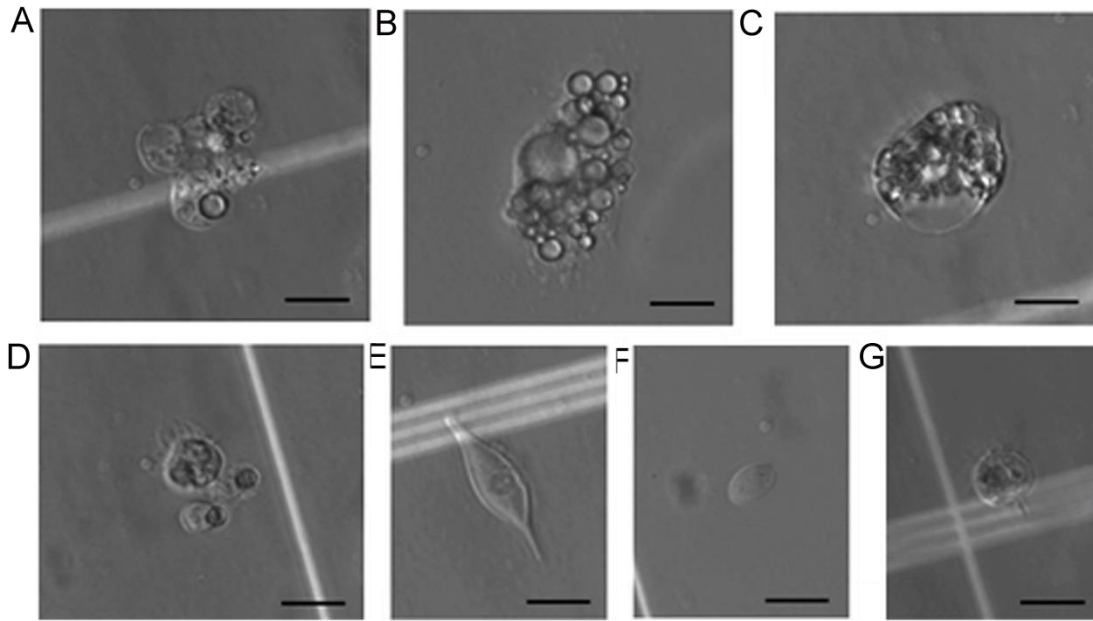

**Figure S5.** Bright field images of representative hemocyte aggregates after fifth instar *R. prolixus* insect exposition to Soyuretox. **(A–C)** Bright field images of a representative hemocyte aggregates (more than 5 cells). **(D)** Bright field images of a representative cluster of less than 5 cells. **(E–G)** Bright field images of a representative free cells. Bars: 20 µm.

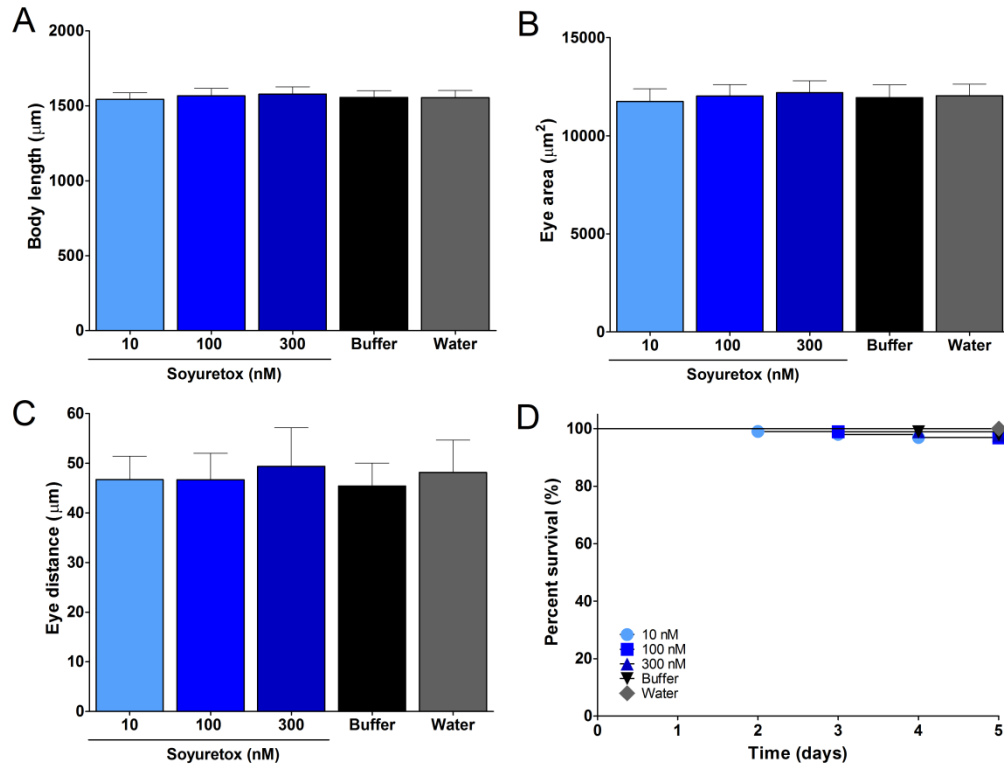

**Figure S6.** Evaluation of the effects promoted in zebrafish after Soyuretox exposition. (A-C) Morphological analyses of zebrafish larvae were conducted 5 dpf after a 4 h exposition to Soyuretox. (A) Body size. (B) Eye area. (C) Eye distance. Data are means  $\pm$  SEM. ANOVA followed by Tukey post-hoc test, with significance level of  $p \leq 0.05$ ; (D) Survival analysis of zebrafish exposed to Soyuretox at 10, 100 and 300 nM. Control experiments were performed in presence of buffer (5 mM sodium phosphate pH 7.0) and water.
